# Supplementary material
Source: publisher figshare collection journal article supplement (https://gsajournals.figshare.com/articles/dataset/_/7811645)
Supplement: Supplementary file 3 [file 2]

**Supplementary table 1**

| <b>Crypt Status</b> | <b>Frequency</b>                   | <b>1x [CA]<sub>30</sub></b> | <b>8x [CA]<sub>30</sub></b> | <b>20x [CA]<sub>30</sub></b> |
|---------------------|------------------------------------|-----------------------------|-----------------------------|------------------------------|
| WPC                 | 1680 per 10 <sup>5</sup><br>crypts | 1 per 60 crypts             | 1 per 8 crypts              | 1 per 3<br>crypts            |
| PPC                 | 458 per 10 <sup>5</sup><br>crypts  | 1 per 218<br>crypts         | 1 per 27<br>crypts          | 1 per 12<br>crypts           |

**Supplementary table 1. Estimates of the number of WPCs and PPCs observed in multiplex groups assaying different numbers of [CA]<sub>30</sub> genomic loci.** The estimates are adapted from Kozar *et al* (2013) for the colon of a 300-day old mouse. The estimates account for autosomal loci being biallelic but only include the rate for in-frame mutations that would lead to YFP expression.

**Supplementary table 2**

| <b>Chrom</b> | <b>Position</b> | <b>Start</b> | <b>End</b> | <b>Type</b> | <b>Distance to nearest gene (bp)</b> | <b>Nearest gene</b> |
|--------------|-----------------|--------------|------------|-------------|--------------------------------------|---------------------|
| 2            | 27425494        | 27425428     | 274254988  | Intergenic  | 23820                                | BC050122            |
| 2            | 120629647       | 120629581    | 120629641  | 4th intron  | 0                                    | Ttbk2               |
| 4            | 136517634       | 136517568    | 136517628  | Intergenic  | 30605                                | Epha8               |
| 6            | 42765004        | 42764938     | 42764998   | Intergenic  | 2534                                 | Olfra450            |
| 8            | 33340003        | 33339937     | 33339997   | Intergenic  | 77570                                | AK143160            |
| 8            | 67422965        | 67422899     | 67422959   | Intergenic  | 48307                                | Tmem192             |
| 8            | 27334305        | 27334239     | 27334299   | Intergenic  | 60968                                | Thap1               |
| 9            | 83283124        | 83283058     | 83283118   | Intergenic  | 5664                                 | Lca5                |
| 9            | 69438700        | 69438634     | 69438694   | Intergenic  | 99322                                | Anxa2               |
| 10           | 20517916        | 20517849     | 20517909   | Intergenic  | 73347                                | Pde7b               |
| 15           | 75067395        | 75067328     | 75067388   | Intergenic  | 20213                                | BC025446            |
| 16           | 42959583        | 42959516     | 42959576   | 2nd intron  | 0                                    | Zbtb20              |
| 19           | 45540170        | 45540103     | 45540163   | 4th intron  | 0                                    | Btrc                |
| X            | 139503016       | 139502950    | 139503010  | Intergenic  | 31136                                | Rgag1               |

**Supplementary table 2. A summary of each microsatellite locus used in the analysis of both wild-type and Msh2-deficient crypts.** The positions relate to that seen in the mm9 reference genome.

**Supplementary table 3**

| Parameter tested                      | Conditions trialed                                                                                                                | Optimal result               |
|---------------------------------------|-----------------------------------------------------------------------------------------------------------------------------------|------------------------------|
| Polymerase                            | NEB Q5, NEB Phusion, NEB Phusion HotStart, NEB Taq, NEB Vent, Kapa HiFi, TwistDx TwistAmp Basic, BioHelix IsoAmpII Universal tHDA | NEB Phusion HotStart         |
| Mg2+:dNTP ratio                       | Mg2+: 1.5mM, 2.0mM, 2.5mM, 3.0mM                                                                                                  | 2.5mM Mg2+ : 1.0mM dNTP      |
|                                       | dNTP: 0.1mM, 0.2mM, 0.5mM, 1.0mM, 1.5mM                                                                                           |                              |
| Buffer concentration                  | 1x, 1.5x, 2x, 2.5x                                                                                                                | 1x                           |
| Primer pool concentration (8 primers) | 4μM, 2μM, 1μM, 0.5μM, 0.3μM                                                                                                       | 2μM (0.25μM per primer pair) |
| Annealing temperature                 | 66.2°C, 67.9°C, 69.2°C, 70.1°C, 70.8°C, 71.0°C                                                                                    | 66.2°C                       |
| Polymerase amount                     | 0.2U, 0.4U, 0.6U, 0.8U, 1.0U                                                                                                      | 0.8U                         |
| Additional glycerol                   | 0%, 1%, 2%, 5%, 7.5%, 10%                                                                                                         | 0%                           |
| Betaine additive                      | 0M, 0.5M, 1.0M, 1.5M, 2.0M                                                                                                        | 0M                           |

**Supplementary table 3. Table summarizing the parameters that were optimized for the multiplex PCR amplification.** The above conditions were tested in the order presented using a multiplex group containing 8 primer pairs. The final multiplex PCR conditions could simultaneously amplify up to 14 amplicons from a single crypt equivalent containing 1ng murine genomic DNA (equivalent to approximately 500 genomes copies) and subsequently from a single murine crypt.

**Supplementary table 4**

| <b>Locus</b> | <b>Lengths isolated</b>                                                           |
|--------------|-----------------------------------------------------------------------------------|
| a4_1365      | [CA] <sub>27</sub> , [CA] <sub>28</sub> , [CA] <sub>29</sub> , [CA] <sub>30</sub> |
| s9_8328      | [CA] <sub>30</sub> , [CA] <sub>31</sub> , [CA] <sub>33</sub>                      |

**Supplementary table 4. [CA] microsatellite lengths isolated from plasmids containing two native murine loci.** Two genomic loci were isolated and mutated before expansion in competent bacterium. The different lengths of microsatellite isolated in each locus, as confirmed by Sanger sequencing, are summarized.

**Supplementary table 5**

| <b>Mouse ID</b> | <b>Age (days)</b> | <b>Locus</b> | <b>Number of crypts tested</b> | <b>PPC (%)</b> | <b>WPC (%)</b> |
|-----------------|-------------------|--------------|--------------------------------|----------------|----------------|
| 16-4988         | 76                | a2_2742      | 144                            | 0.00           | 0.00           |
| 16-4988         | 76                | s16_4295     | 144                            | 0.00           | 0.69           |
| 16-4988         | 76                | a4_1365      | 144                            | 0.00           | 0.00           |
| 16-4988         | 76                | s2_1206      | 144                            | 0.00           | 0.00           |
| 16-4988         | 76                | s9_8328      | 144                            | 0.00           | 0.00           |
| 16-4988         | 76                | a6_4276      | 144                            | 0.00           | 0.69           |
| 16-4988         | 76                | s8_2733      | 144                            | 0.00           | 0.00           |
| 16-4988         | 76                | s9_6943      | 144                            | 0.00           | 0.00           |
| 16-20751        | 179               | a2_2742      | 144                            | 0.00           | 0.00           |
| 16-20751        | 179               | s16_4295     | 144                            | 0.00           | 0.00           |
| 16-20751        | 179               | a4_1365      | 144                            | 2.78           | 0.00           |
| 16-20751        | 179               | s2_1206      | 144                            | 0.00           | 0.00           |
| 16-20751        | 179               | s9_8328      | 144                            | 0.00           | 0.00           |
| 16-20751        | 179               | a6_4276      | 144                            | 1.39           | 0.00           |
| 16-20751        | 179               | a10_2051     | 144                            | 0.00           | 0.00           |
| 16-20751        | 179               | s8_2733      | 144                            | 0.00           | 0.00           |
| 16-20751        | 179               | s9_6943      | 144                            | 0.00           | 0.00           |
| 16-20751        | 179               | a19_4554     | 144                            | 0.00           | 0.00           |
| 16-20752        | 189               | a2_2742      | 136                            | 0.00           | 0.00           |
| 16-20752        | 189               | s16_4295     | 136                            | 0.00           | 0.00           |
| 16-20752        | 189               | a4_1365      | 136                            | 2.21           | 0.00           |
| 16-20752        | 189               | s2_1206      | 136                            | 0.00           | 0.00           |
| 16-20752        | 189               | s9_8328      | 136                            | 0.00           | 0.00           |
| 16-20752        | 189               | a6_4276      | 136                            | 0.00           | 0.00           |
| 16-20752        | 189               | a10_2051     | 136                            | 0.00           | 0.00           |
| 16-20752        | 189               | s8_2733      | 136                            | 0.00           | 0.00           |
| 16-20752        | 189               | s9_6943      | 136                            | 2.21           | 0.74           |
| 16-20752        | 189               | a19_4554     | 136                            | 0.00           | 0.74           |
| 14-11319        | 697               | a2_2742      | 144                            | 0.00           | 0.00           |
| 14-11319        | 697               | s16_4295     | 144                            | 0.00           | 0.00           |
| 14-11319        | 697               | a4_1365      | 144                            | 0.69           | 0.69           |
| 14-11319        | 697               | s2_1206      | 144                            | 0.00           | 0.00           |
| 14-11319        | 697               | s8_3334      | 144                            | 0.00           | 2.08           |
| 14-11319        | 697               | s9_8328      | 144                            | 0.00           | 2.08           |
| 14-11319        | 697               | a6_4276      | 144                            | 0.00           | 2.08           |
| 14-11319        | 697               | s9_6943      | 144                            | 4.86           | 1.39           |
| 14-11319        | 697               | a19_4554     | 144                            | 0.00           | 0.69           |

|         |     |          |     |      |      |
|---------|-----|----------|-----|------|------|
| 14-5007 | 735 | a2_2742  | 176 | 0.00 | 0.57 |
| 14-5007 | 735 | s16_4295 | 175 | 0.00 | 0.57 |
| 14-5007 | 735 | a4_1365  | 176 | 1.14 | 0.57 |
| 14-5007 | 735 | s2_1206  | 176 | 0.00 | 1.14 |
| 14-5007 | 735 | s8_3334  | 176 | 0.00 | 2.27 |
| 14-5007 | 735 | s9_8328  | 176 | 1.70 | 5.68 |
| 14-5007 | 735 | a6_4276  | 176 | 0.00 | 1.70 |
| 14-5007 | 735 | a10_2051 | 86  | 0.00 | 0.00 |
| 14-5007 | 735 | s15_7506 | 85  | 0.00 | 1.18 |
| 14-5007 | 735 | s8_2733  | 176 | 0.00 | 0.57 |
| 14-5007 | 735 | s9_6943  | 176 | 5.11 | 0.57 |
| 14-5007 | 735 | a19_4554 | 176 | 0.00 | 0.57 |

**Supplementary table 5. A summary of all crypts sequenced in wild-type mice and the percentage of mutant crypts observed in each.**

**Supplementary table 6**

| <b>Mouse ID</b> | <b>Post-induction (days)</b> | <b>Locus</b> | <b>Number of crypts tested</b> | <b>PPC (%)</b> | <b>WPC (%)</b> |
|-----------------|------------------------------|--------------|--------------------------------|----------------|----------------|
| 15-40981        | 28                           | a2_2742      | 143                            | 7.69           | 2.10           |
| 15-40981        | 28                           | s16_4295     | 141                            | 5.67           | 3.55           |
| 15-40981        | 28                           | a4_1365      | 141                            | 12.06          | 9.93           |
| 15-40981        | 28                           | s2_1206      | 142                            | 7.04           | 4.23           |
| 15-40981        | 28                           | s8_3334      | 142                            | 7.04           | 4.23           |
| 15-40981        | 28                           | s9_8328      | 144                            | 6.25           | 5.56           |
| 15-40981        | 28                           | a6_4276      | 144                            | 5.56           | 8.33           |
| 15-40981        | 28                           | s15_7506     | 143                            | 3.50           | 0.70           |
| 15-40981        | 28                           | s8_2733      | 142                            | 4.23           | 2.82           |
| 15-40981        | 28                           | s9_6943      | 143                            | 17.48          | 10.49          |
| 15-40981        | 28                           | a19_4554     | 144                            | 4.17           | 2.78           |
| 16-38330        | 43                           | a2_2742      | 72                             | 4.17           | 11.11          |
| 16-38330        | 43                           | s16_4295     | 72                             | 4.17           | 11.11          |
| 16-38330        | 43                           | a4_1365      | 72                             | 5.56           | 8.33           |
| 16-38330        | 43                           | s2_1206      | 72                             | 4.17           | 8.33           |
| 16-38330        | 43                           | s8_3334      | 72                             | 5.56           | 6.94           |
| 16-38330        | 43                           | s9_8328      | 72                             | 12.50          | 4.17           |
| 16-38330        | 43                           | a6_4276      | 72                             | 4.17           | 11.11          |
| 16-38330        | 43                           | s15_7506     | 72                             | 2.78           | 11.11          |
| 16-38330        | 43                           | s8_2733      | 72                             | 1.39           | 6.94           |
| 16-38330        | 43                           | s9_6943      | 72                             | 5.56           | 6.94           |
| 16-38330        | 43                           | a19_4554     | 72                             | 5.56           | 5.56           |
| 16-31579        | 59                           | a2_2742      | 72                             | 4.17           | 18.06          |
| 16-31579        | 59                           | s16_4295     | 71                             | 2.82           | 18.31          |
| 16-31579        | 59                           | a4_1365      | 70                             | 8.57           | 21.43          |
| 16-31579        | 59                           | s2_1206      | 72                             | 2.78           | 30.56          |
| 16-31579        | 59                           | s8_3334      | 72                             | 2.78           | 13.89          |
| 16-31579        | 59                           | s9_8328      | 72                             | 1.39           | 19.44          |
| 16-31579        | 59                           | a6_4276      | 71                             | 5.63           | 22.54          |
| 16-31579        | 59                           | s15_7506     | 71                             | 2.82           | 19.72          |
| 16-31579        | 59                           | s8_2733      | 72                             | 6.94           | 13.89          |
| 16-31579        | 59                           | s9_6943      | 72                             | 37.50          | 11.11          |
| 16-31579        | 59                           | a19_4554     | 72                             | 8.33           | 25.00          |
| 15-37022        | 70                           | a2_2742      | 215                            | 4.65           | 34.88          |
| 15-37022        | 70                           | s16_4295     | 215                            | 4.65           | 28.84          |
| 15-37022        | 70                           | a4_1365      | 215                            | 28.84          | 30.70          |
| 15-37022        | 70                           | s2_1206      | 216                            | 6.02           | 37.04          |

|          |     |          |     |       |       |
|----------|-----|----------|-----|-------|-------|
| 15-37022 | 70  | s8_3334  | 144 | 5.56  | 25.69 |
| 15-37022 | 70  | s9_8328  | 216 | 24.54 | 35.19 |
| 15-37022 | 70  | a6_4276  | 216 | 6.02  | 35.19 |
| 15-37022 | 70  | s15_7506 | 215 | 8.84  | 19.53 |
| 15-37022 | 70  | s8_2733  | 216 | 3.24  | 31.48 |
| 15-37022 | 70  | s9_6943  | 216 | 11.11 | 47.22 |
| 15-37022 | 70  | a19_4554 | 216 | 4.63  | 53.70 |
| 15-38571 | 102 | a2_2742  | 96  | 12.50 | 43.75 |
| 15-38571 | 102 | s16_4295 | 96  | 10.42 | 37.50 |
| 15-38571 | 102 | a4_1365  | 96  | 12.50 | 39.58 |
| 15-38571 | 102 | s2_1206  | 96  | 5.21  | 38.54 |
| 15-38571 | 102 | s8_3334  | 96  | 9.38  | 36.46 |
| 15-38571 | 102 | s9_8328  | 96  | 1.04  | 40.63 |
| 15-38571 | 102 | a6_4276  | 96  | 3.13  | 41.67 |
| 15-38571 | 102 | s15_7506 | 96  | 17.71 | 31.25 |
| 15-38571 | 102 | s8_2733  | 96  | 6.25  | 45.83 |
| 15-38571 | 102 | a19_4554 | 96  | 11.46 | 25.00 |
| 15-28159 | 121 | a2_2742  | 192 | 6.25  | 29.69 |
| 15-28159 | 121 | s16_4295 | 192 | 4.69  | 23.44 |
| 15-28159 | 121 | a4_1365  | 192 | 7.81  | 31.77 |
| 15-28159 | 121 | s2_1206  | 192 | 3.65  | 30.21 |
| 15-28159 | 121 | s8_3334  | 192 | 7.29  | 26.04 |
| 15-28159 | 121 | s9_8328  | 192 | 9.90  | 20.31 |
| 15-28159 | 121 | a6_4276  | 192 | 4.69  | 25.00 |
| 15-28159 | 121 | s15_7506 | 192 | 6.25  | 18.75 |
| 15-28159 | 121 | s8_2733  | 189 | 2.65  | 28.57 |
| 15-28159 | 121 | s9_6943  | 191 | 24.08 | 24.61 |
| 15-28159 | 121 | a19_4554 | 192 | 3.13  | 22.92 |

**Supplementary table 6. A summary of all crypts sequenced in Msh2 conditional knockout mice and the percentage of mutant crypts observed in each.**



**Supplementary table 7**

| <b>Locus</b> | <b>Mutations per mitosis (95% C.I.)</b> |
|--------------|-----------------------------------------|
| s9_6943      | 0.0298 (0.0244 - 0.0365)                |
| a19_4554     | 0.0286 (0.0237 – 0.034)                 |
| s2_1206      | 0.0286 (0.0239 – 0.0345)                |
| a4_1365      | 0.0269 (0.0224 – 0.0325)                |
| a2_2742      | 0.0264 (0.0219 – 0.0318)                |
| a6_4276      | 0.0264 (0.0219 – 0.0318)                |
| s8_2733      | 0.0241 (0.02 – 0.0293)                  |
| s9_8328      | 0.0222 (0.0185 – 0.0271)                |
| s16_4295     | 0.0207 (0.017 – 0.0249)                 |
| s8_3334      | 0.0185 (0.0153 – 0.0227)                |
| s15_7506     | 0.0145 (0.0118 – 0.0177)                |

**Supplementary table 7. Summary of locus-specific microsatellite mutation rates at 11 loci in Msh2-deficient intestinal epithelium.** Microsatellite mutation per mitosis rates were inferred from clone size dynamics in Msh2-deficient epithelium using the mathematical model described by Kozar et al (2013) and the values for functional stem cell number and stem cell replacement rate that they calculated. An approximately 2-fold range in mutation rate is observed across the loci studied.
