# Supplementary material
Source: publisher figshare collection journal article supplement (https://gsajournals.figshare.com/articles/dataset/_/7811645)

# Supplementary Figure 3

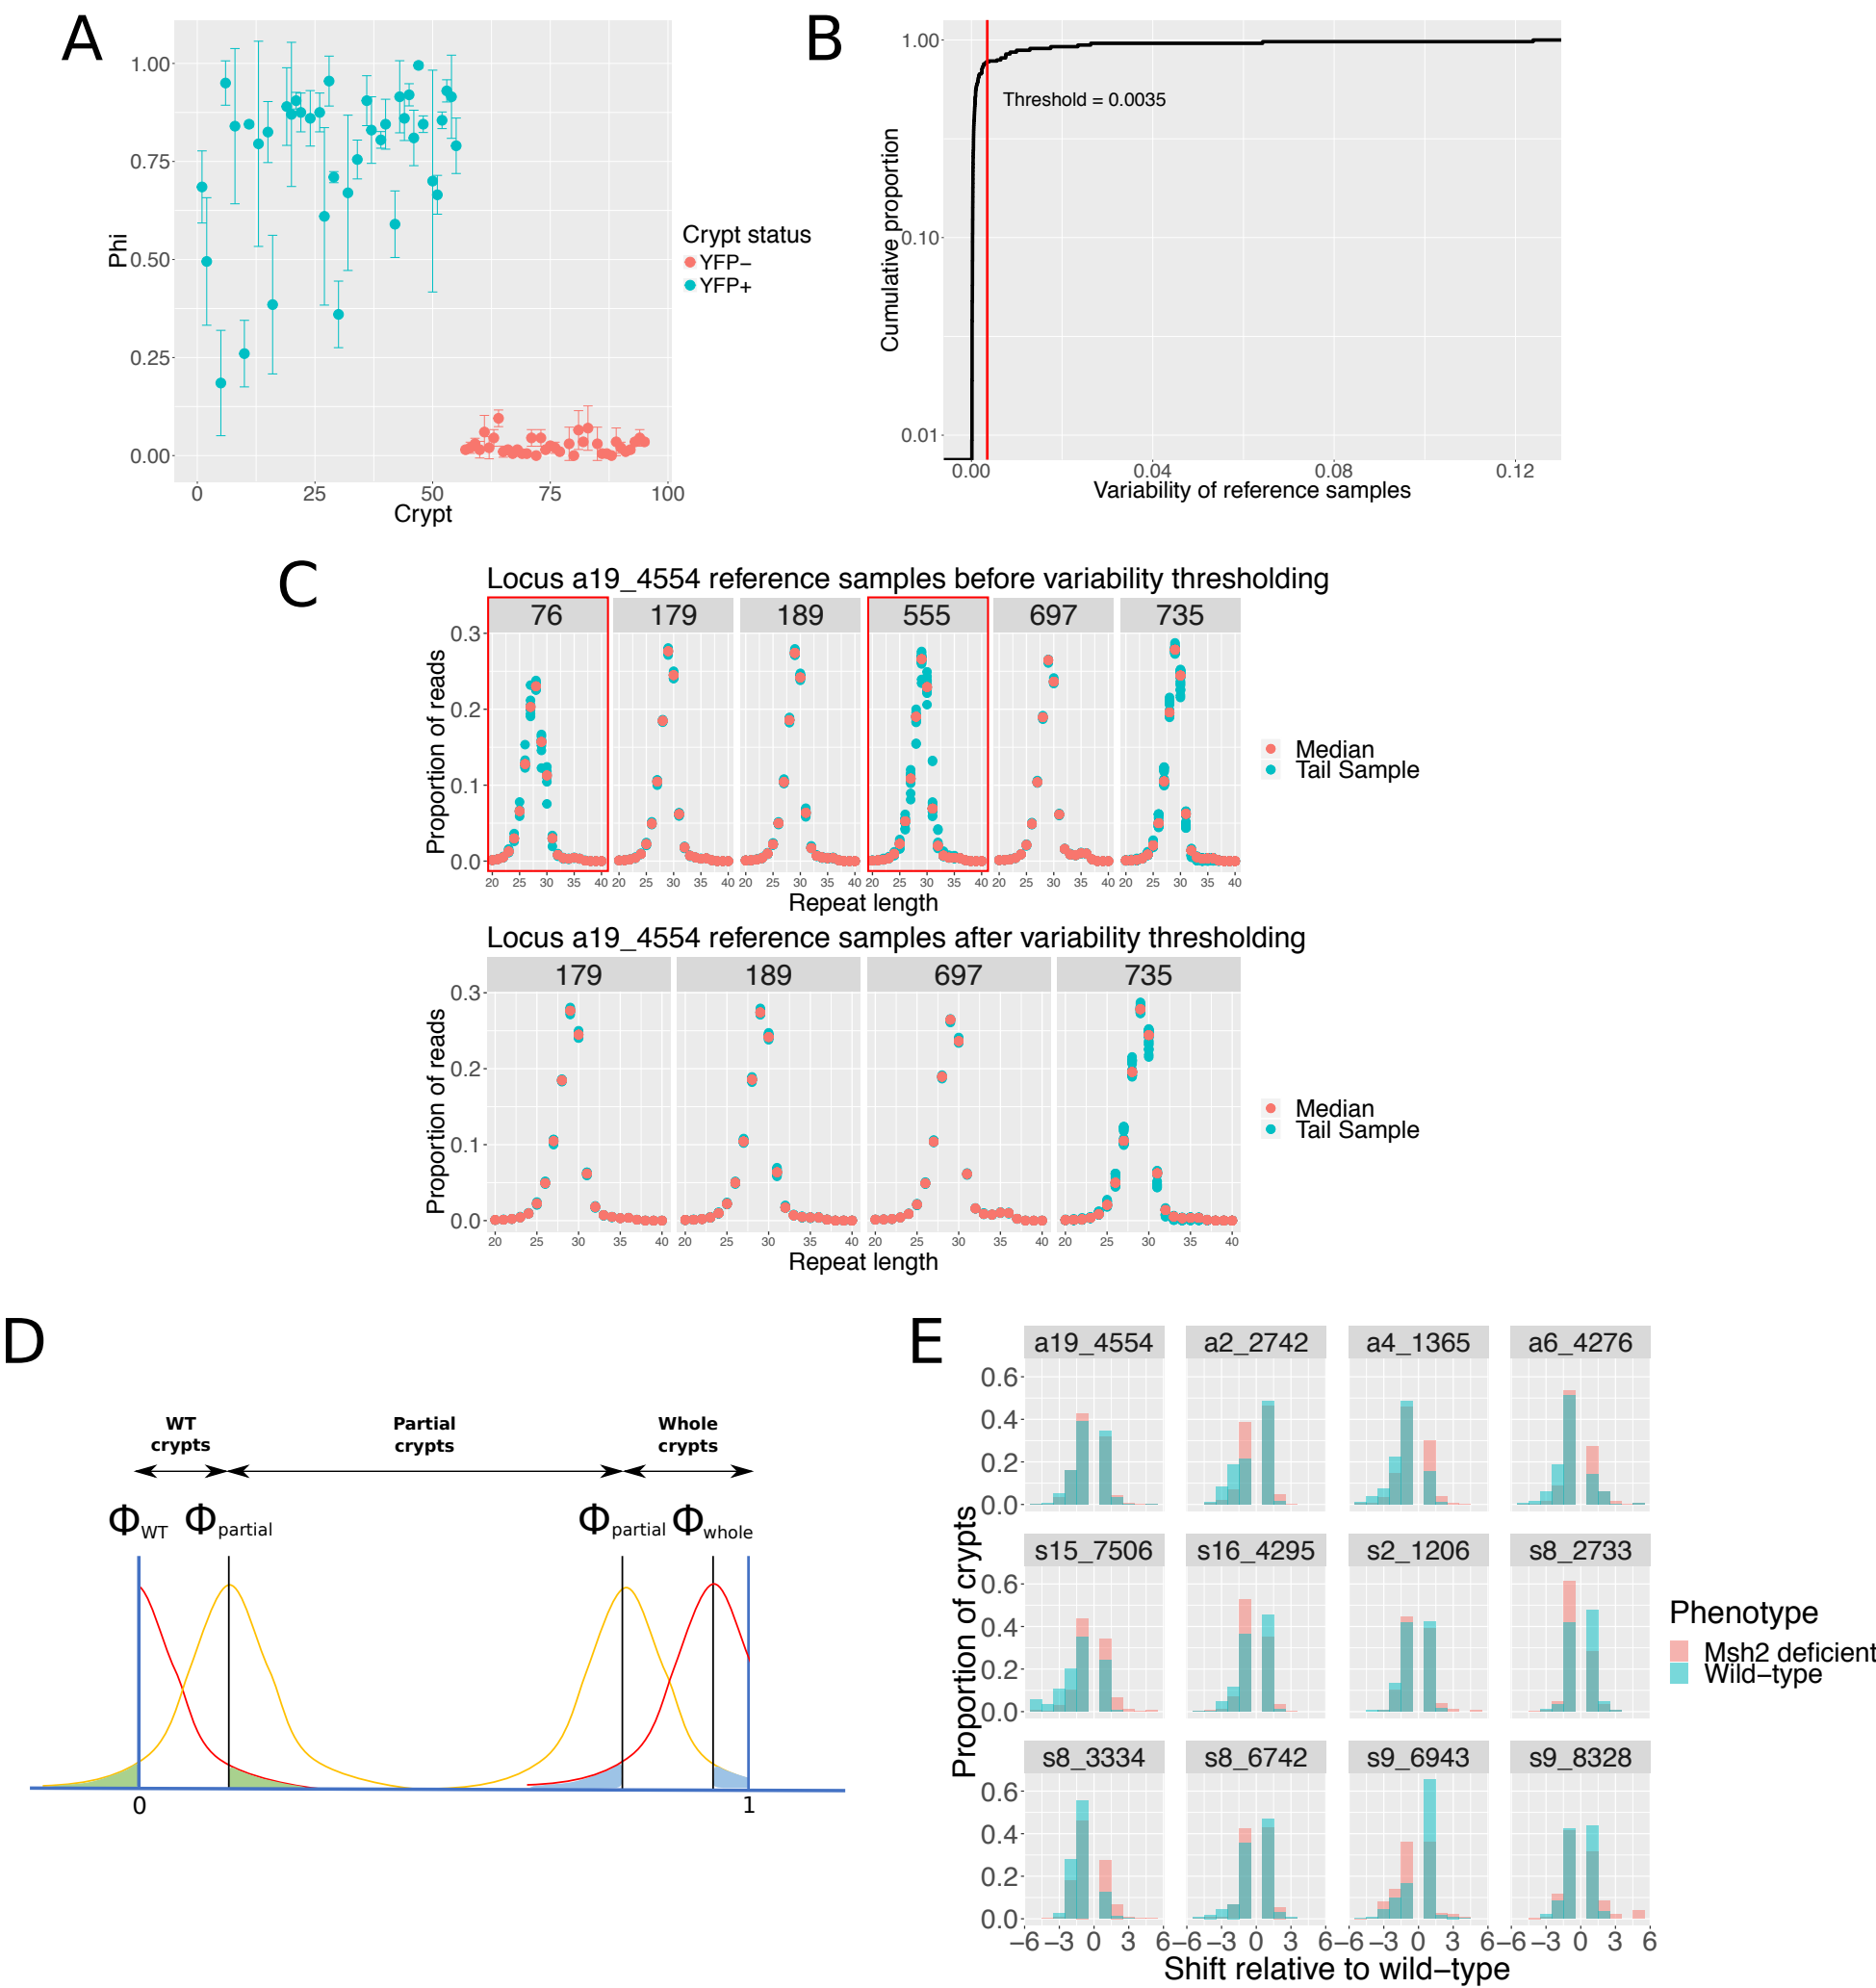

Supplement: Supplementary file 1 [file 2]

# Supplementary Figure 1

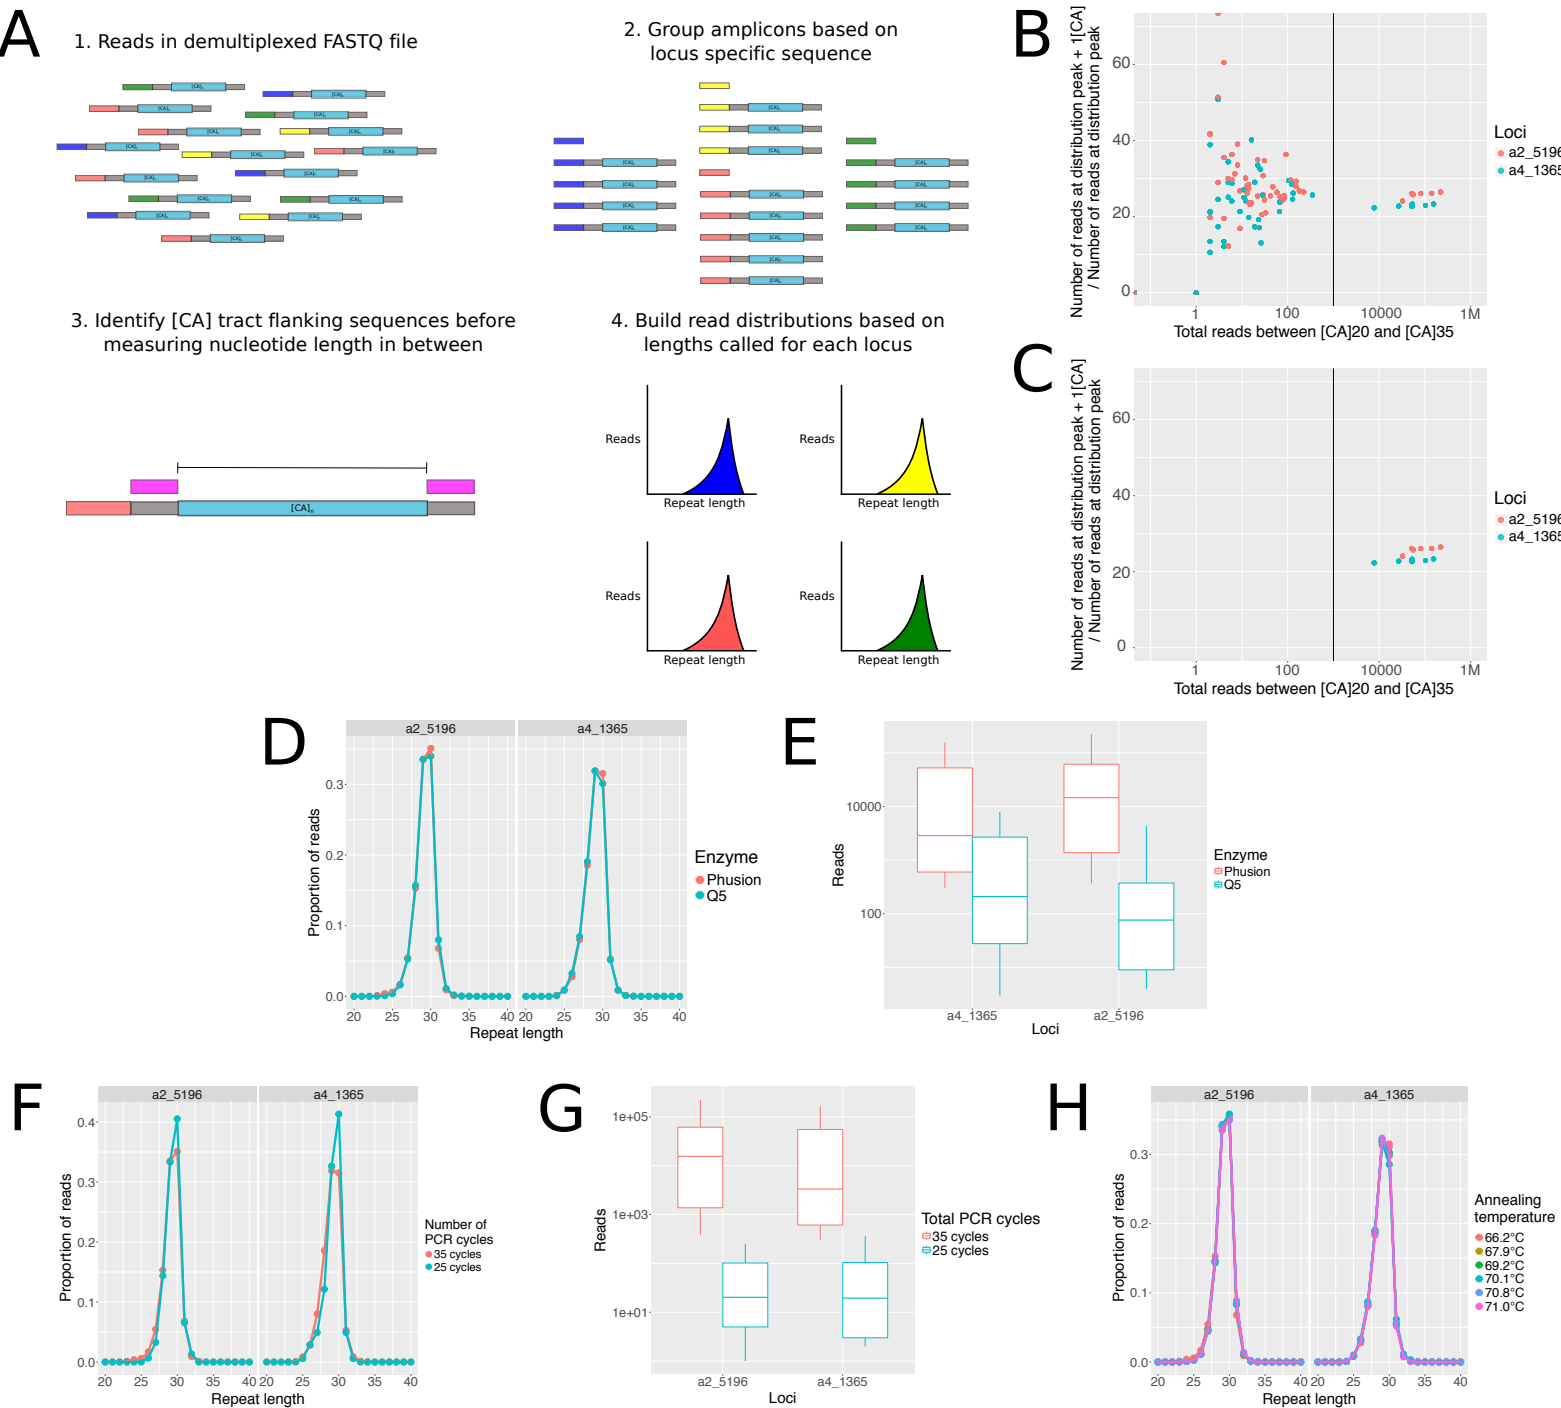

Supplement: Supplementary file 2 [file 2]

# Supplementary Figure 2

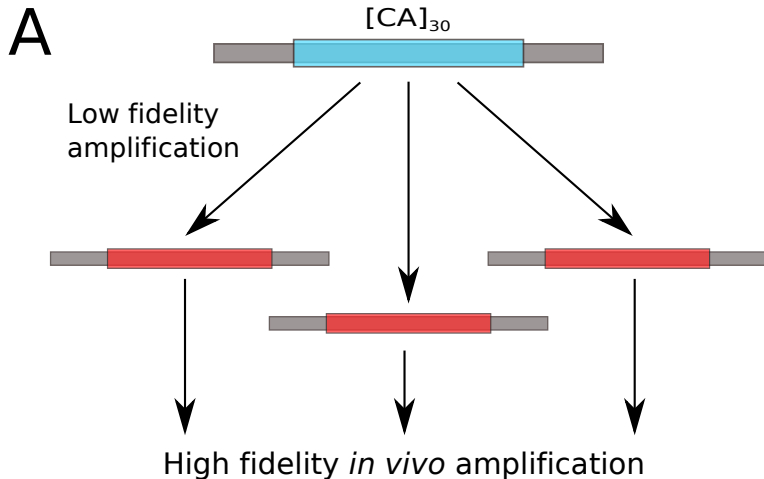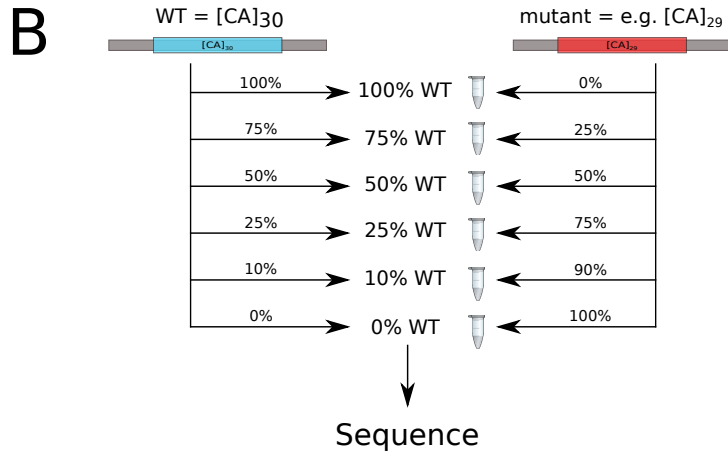

Supplement: Supplementary file 4 [file 2]
